# Supplementary material for: Mushroomβ-Glucan May Immunomodulate the Tumor-Associated Macrophages in the Lewis Lung Carcinoma
Source: Hindawi journal article supplement (doi:10.1155/2015/604385), 2015-01-01
Supplement: f1 [file 604385.f1.pdf]

## Supplement Data

### Legends

**Supplement Data 1. The observation of the tumor size after oral the mushroom beta glucan compared to the control (fed with twice-distilled water).** \*Group TC: fed with twice-distilled water; TM: fed with celecoxib; group TB: fed with *Antrodia camphorata* beta-glucan; group TX: fed with Ganoderma beta-glucan.

**Supplement Data 2. Using the HPLC to analyze the *Ganoderma lucidum* polysaccharides**

**Supplement Data 3. Using the HPLC to analyze the *Ganoderma lucidum* polysaccharides**

**Supplement Data 4. The Flow cytometry analyze the percentage of the M1 and M2 ration in each group.** \*Group PC: fed with twice-distilled water; group PB: fed with *Antrodia camphorata* beta-glucan (Without Tumor Bearing). Group TC: fed with twice-distilled water; group TM: fed with celecoxib; group TB: fed with *Antrodia camphorata* beta-glucan; group TX: fed with Ganoderma beta-glucan. (Tumor Bearing)

1     Supplement Data 1. The observation of the tumor

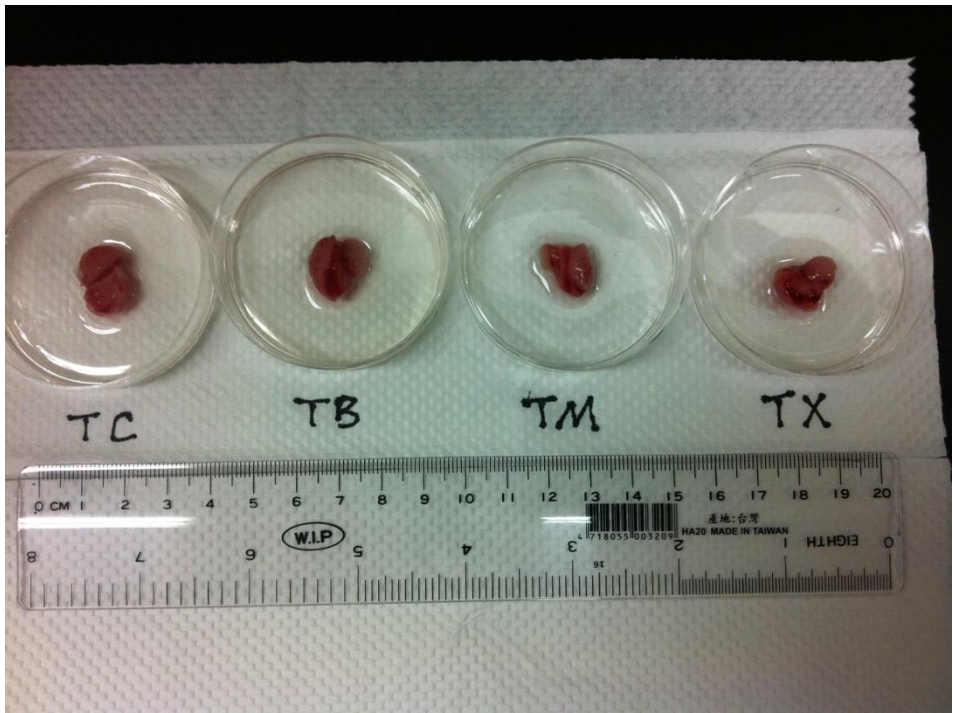

2

3     Supplement Data 2. HPLC analysis of *Genoderma lucidum* polysaccharides

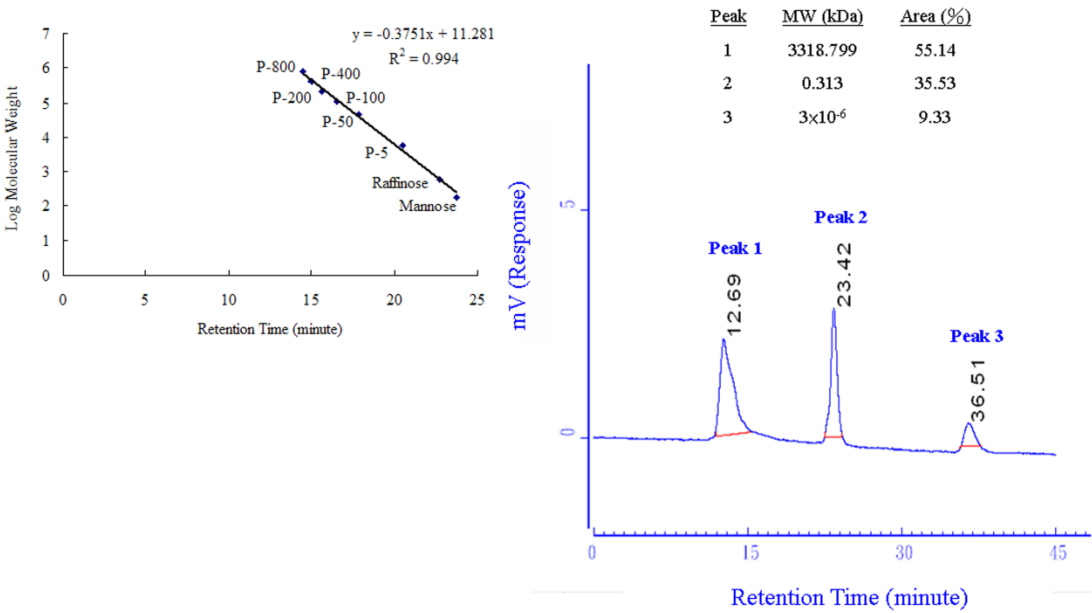

4

5

1     **Supplement Data 3. HPLC analysis of *Ganoderma lucidum* polysaccharides**

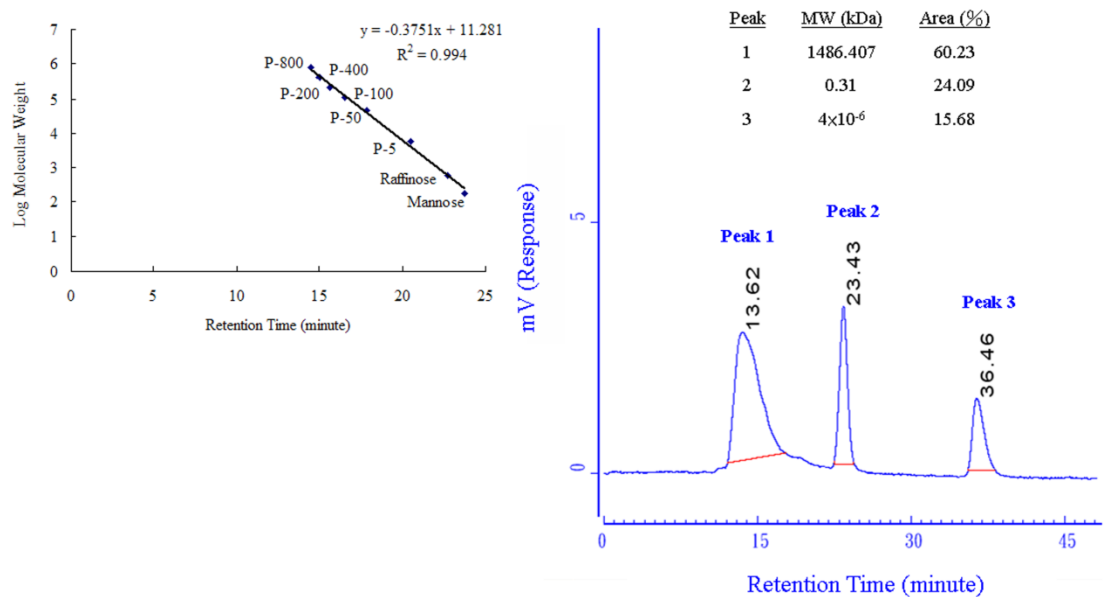

2

3

4     **Supplement Data 4. The Flow cytometry analysis**

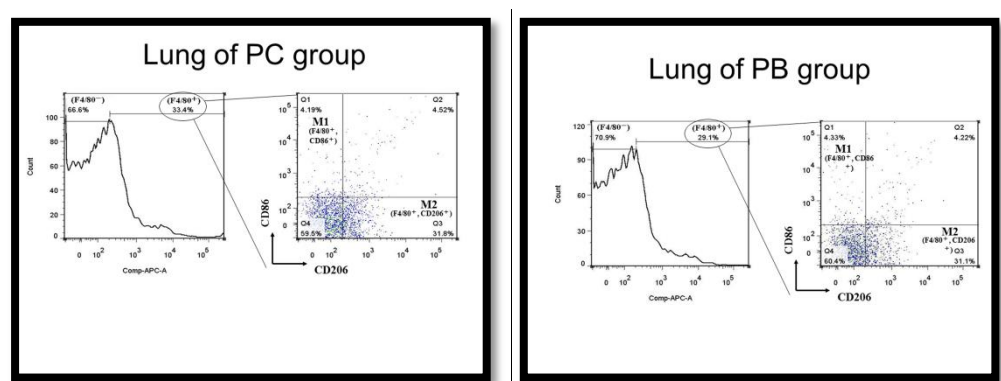

5

6

7

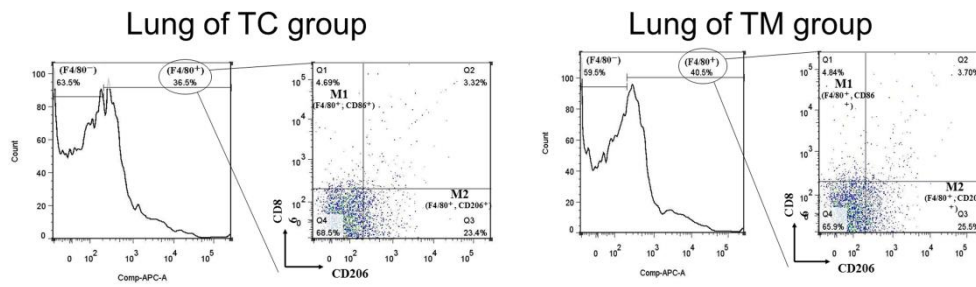

1

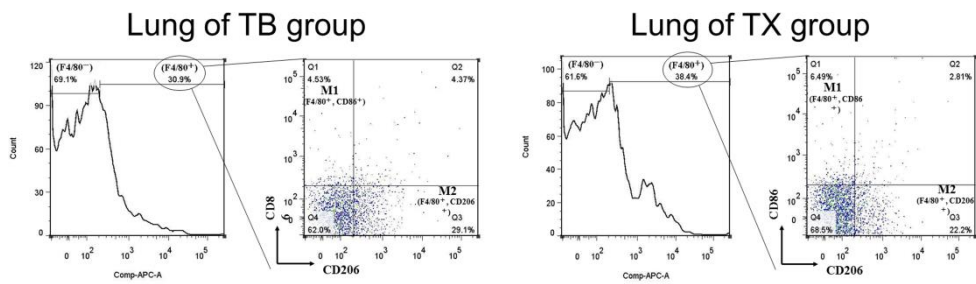

2

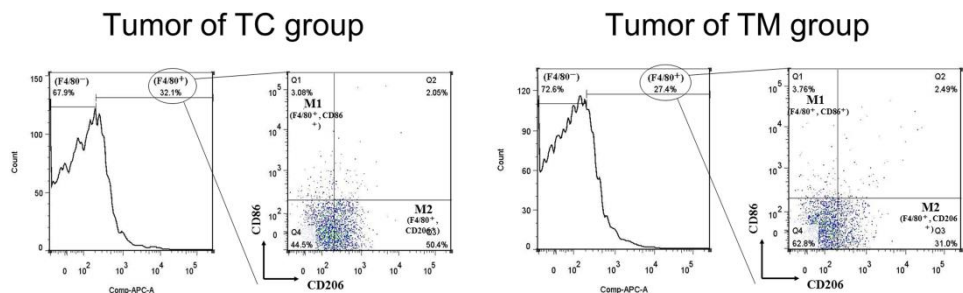

3

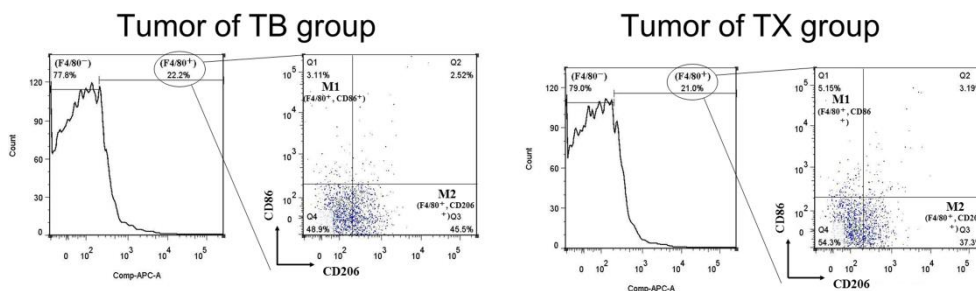

4

5
